# Supplementary material
Source: PubMed Central journal article supplement (PMC2830336)

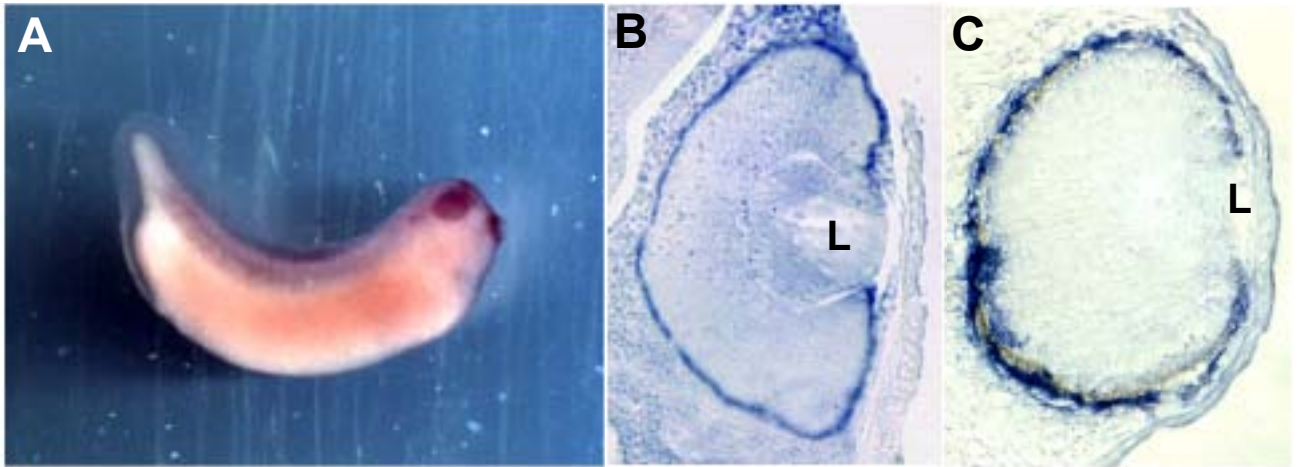

Supplement: NIHMS169613-supplement-01.pdf [file NIHMS169613-supplement-01.pdf]
